# Supplementary material
Source: Springer Nature journal article supplement (https://www.springermedizin.de/resource/supplementary/12889_2014_6746_MOESM2_ESM.pdf/9498946)
Supplement: MOESM2 [file 9498946]

**Sri Lanka Diabetes and Cardiovascular Diseases Study (SLDCS)**

(Annexure 3) to Main Questionnaire

**Quantification of Units of alcohol consumed within a week**

- Have you taken an alcoholic drink during the last 6 months?    Yes
- No
- If the answer to the above question is **Yes**, indicate the **type** of alcoholic drink you **mostly** consume and the quantity **per week**

| Type of alcoholic beverage           | Quantity per single consumption<br>(Drinks, Glasses, Pints)    | Frequency per week<br>(How many times do you drink per week?) | Total units* consumed per week by each beverage |
|--------------------------------------|----------------------------------------------------------------|---------------------------------------------------------------|-------------------------------------------------|
| Arrack                               | ..... (drinks)<br><i>(1 drink= 25-30 ml)</i>                   | .....                                                         | .....                                           |
| Whisky                               | ..... (drinks)<br><i>(1 drink= 25-30 ml)</i>                   | .....                                                         | .....                                           |
| Other**                              | ..... (drinks)<br><i>(1 drink= 25-30 ml)</i>                   | .....                                                         | .....                                           |
| Illicit spirits                      | ..... .. (drinks)<br><i>(1 drink= 50 ml)</i>                   | .....                                                         | .....                                           |
| Wine                                 | ..... .. (glasses of wine)<br><i>(1 glass of wine= 175 ml)</i> | .....                                                         | .....                                           |
| Beer                                 | ..... (Pints)<br><i>(1 pint= 200-250 ml)</i>                   | .....                                                         | .....                                           |
| Toddy                                | ..... (Pints)<br><i>(1 pint= 200-250 ml)</i>                   | .....                                                         | .....                                           |
| <b>Total units consumed per week</b> |                                                                |                                                               | <b>: .....</b>                                  |

\*1 unit of alcohol= 1 drink of arrack/whisky, 2 drinks of illicit spirit, 1 small glass of wine, half a pint of beer/toddy (ref- Calculation of the number of units of different types of alcohol in Sri Lanka-Reference table)

\*\* Other alcoholic spirits/beverages such as brandy, gin, vodka.
